# Supplementary material
Source: PubMed Central journal article supplement (PMC3170999)

## Supplementary Figure 2

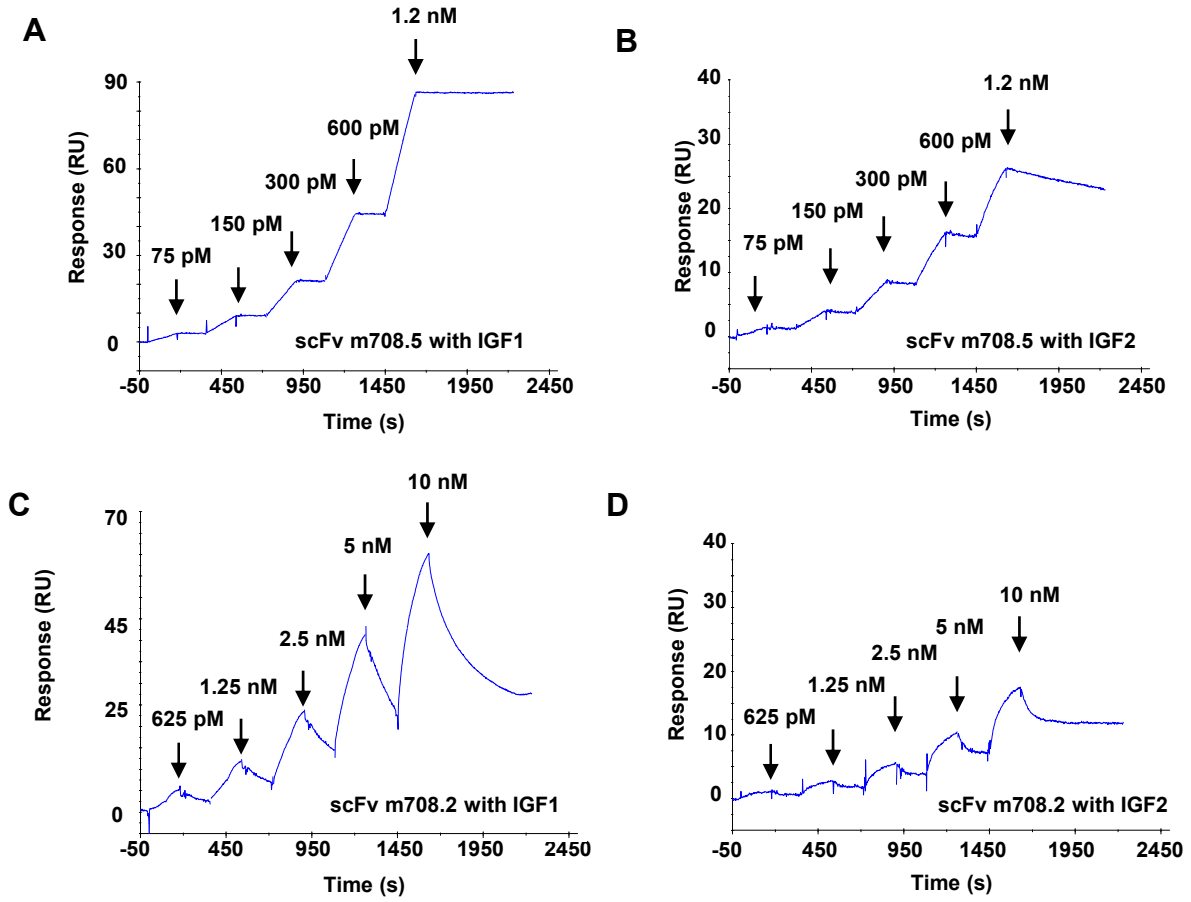

Supplement: NIHMS311163-supplement-2.pdf [file NIHMS311163-supplement-2.pdf]

Supplementary Figure 1

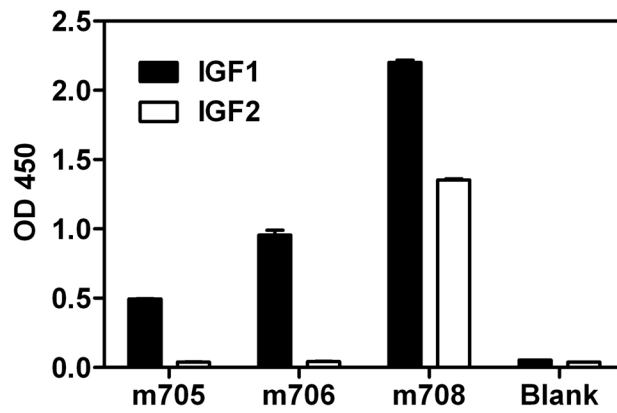

Supplement: NIHMS311163-supplement-8.pdf [file NIHMS311163-supplement-8.pdf]

### Supplementary Figure 3

A

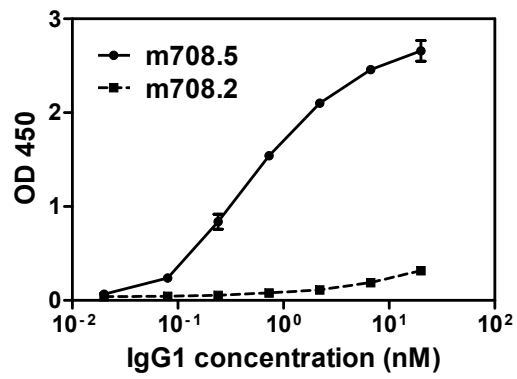

B

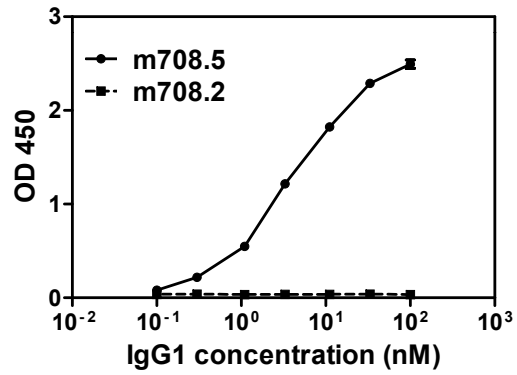

Supplement: NIHMS311163-supplement-9.pdf [file NIHMS311163-supplement-9.pdf]
